# Supplementary material
Source: PubMed Central journal article supplement (PMC6056898)
Supplement: Kane_Tables_S1-S3.pdf [file Kane_Tables_S1-S3.pdf]

Running Head: Daily Life Mind-Wandering

**SUPPLEMENTAL DATA TABLES FOR:**

For Whom The Mind Wanders, And When, Varies Across Laboratory and Daily-Life Settings

Michael J. Kane, Georgina M. Gross, Charlotte A. Chun, Bridget A. Smeekens

University of North Carolina at Greensboro

Matt E. Meier

Western Carolina University

Paul J. Silvia, and Thomas R. Kwapil

University of North Carolina at Greensboro

Please address all correspondence to:

Michael J. Kane

Department of Psychology

University of North Carolina at Greensboro

Greensboro, NC 27402-6170

Email: [mjkane@uncg.edu](mailto:mjkane@uncg.edu)

Supplemental Table S1. Predictions of ESM context/mood reports by level-2 personality constructs (standardized and tested simultaneously).

|                    | b            | SE         | t            | p               |
|--------------------|--------------|------------|--------------|-----------------|
| <i>Concentrate</i> |              |            |              |                 |
| Openness           | .02          | .05        | 0.28         | >.250           |
| Conscientiousness  | .10          | .06        | 1.71         | .087            |
| Extraversion       | -.06         | .06        | -1.06        | >.250           |
| Agreeableness      | .08          | .05        | 1.40         | .162            |
| Neuroticism        | .01          | .06        | 0.14         | >.250           |
| <i>Happy</i>       |              |            |              |                 |
| Openness           | .01          | .05        | 0.29         | >.250           |
| Conscientiousness  | .09          | .05        | 1.65         | .099            |
| Extraversion       | <b>.20*</b>  | <b>.06</b> | <b>3.49</b>  | <b>&lt;.001</b> |
| Agreeableness      | <b>.14*</b>  | <b>.05</b> | <b>2.98</b>  | <b>.004</b>     |
| Neuroticism        | <b>-.21*</b> | <b>.05</b> | <b>-4.01</b> | <b>&lt;.001</b> |
| <i>Confused</i>    |              |            |              |                 |
| Openness           | -.04         | .06        | -0.80        | >.250           |
| Conscientiousness  | -.11         | .07        | -1.63        | .103            |
| Extraversion       | <b>.20*</b>  | <b>.05</b> | <b>3.83</b>  | <b>&lt;.001</b> |
| Agreeableness      | -.10         | .06        | -1.73        | .084            |
| Neuroticism        | <b>.31*</b>  | <b>.06</b> | <b>5.65</b>  | <b>&lt;.001</b> |
| <i>Irritable</i>   |              |            |              |                 |
| Openness           | -.02         | .06        | -0.30        | >.250           |
| Conscientiousness  | -.14         | .07        | -2.03        | .043            |
| Extraversion       | .14          | .07        | 1.90         | .057            |
| Agreeableness      | -.12         | .06        | -2.11        | .035            |
| Neuroticism        | <b>.32*</b>  | <b>.07</b> | <b>4.73</b>  | <b>&lt;.001</b> |

Supplemental Table S1. (continued).

|                   | b           | SE         | t           | p               |
|-------------------|-------------|------------|-------------|-----------------|
| <i>Safe</i>       |             |            |             |                 |
| Openness          | .02         | .05        | 0.41        | >.250           |
| Conscientiousness | .05         | .06        | 0.90        | >.250           |
| Extraversion      | .10         | .05        | 1.77        | .077            |
| Agreeableness     | .13         | .05        | 2.41        | .016            |
| Neuroticism       | -.15        | .06        | -2.65       | .008            |
| <i>Anxious</i>    |             |            |             |                 |
| Openness          | .06         | .07        | 0.86        | >.250           |
| Conscientiousness | -.10        | .08        | -1.28       | .200            |
| Extraversion      | .12         | .08        | 1.61        | .107            |
| Agreeableness     | -.05        | .08        | -0.71       | >.250           |
| Neuroticism       | <b>.44*</b> | <b>.07</b> | <b>5.95</b> | <b>&lt;.001</b> |
| <i>Tired</i>      |             |            |             |                 |
| Openness          | -.12        | .06        | -1.94       | .053            |
| Conscientiousness | -.10        | .07        | -1.56       | .118            |
| Extraversion      | .20         | .08        | 2.62        | .009            |
| Agreeableness     | .04         | .07        | 0.54        | >.250           |
| Neuroticism       | <b>.23*</b> | <b>.06</b> | <b>3.61</b> | <b>&lt;.001</b> |
| <i>Sad</i>        |             |            |             |                 |
| Openness          | -.05        | .05        | -1.06       | >.250           |
| Conscientiousness | -.09        | .06        | -1.36       | .174            |
| Extraversion      | .05         | .05        | 1.10        | >.250           |
| Agreeableness     | -.05        | .05        | -0.89       | >.250           |
| Neuroticism       | <b>.34*</b> | <b>.05</b> | <b>6.37</b> | <b>&lt;.001</b> |

Supplemental Table S1. (continued).

|                           | b            | SE         | t            | p           |
|---------------------------|--------------|------------|--------------|-------------|
| <i>Perception Strange</i> |              |            |              |             |
| Openness                  | -.07         | .03        | -2.10        | .036        |
| Conscientiousness         | -.05         | .03        | -1.54        | .122        |
| Extraversion              | .08          | .03        | 2.66         | .008        |
| Agreeableness             | -.11         | .04        | -2.77        | .006        |
| Neuroticism               | .06          | .03        | 2.04         | .042        |
| <i>Like Activity</i>      |              |            |              |             |
| Openness                  | .09          | .04        | 2.05         | .040        |
| Conscientiousness         | .04          | .05        | 0.74         | >.250       |
| Extraversion              | .00          | .05        | 0.03         | >.250       |
| Agreeableness             | .12          | .05        | 2.53         | .011        |
| Neuroticism               | <b>-.19*</b> | <b>.06</b> | <b>-3.30</b> | <b>.001</b> |
| <i>Effortful Activity</i> |              |            |              |             |
| Openness                  | -.01         | .05        | -0.26        | >.250       |
| Conscientiousness         | .07          | .06        | 1.25         | .211        |
| Extraversion              | .11          | .06        | 1.95         | .051        |
| Agreeableness             | -.01         | .06        | -0.26        | >.250       |
| Neuroticism               | .15          | .06        | 2.43         | .015        |
| <i>Boring Activity</i>    |              |            |              |             |
| Openness                  | <b>-.17*</b> | <b>.05</b> | <b>-3.31</b> | <b>.001</b> |
| Conscientiousness         | -.07         | .06        | -1.25        | .211        |
| Extraversion              | .10          | .06        | 1.76         | .076        |
| Agreeableness             | -.08         | .05        | -1.42        | .156        |
| Neuroticism               | <b>.18*</b>  | <b>.06</b> | <b>2.91</b>  | <b>.004</b> |

Supplemental Table S1. (continued).

|                            | b            | SE         | t            | p               |
|----------------------------|--------------|------------|--------------|-----------------|
| <i>Successful Activity</i> |              |            |              |                 |
| Openness                   | .07          | .05        | 1.52         | .128            |
| Conscientiousness          | <b>.16*</b>  | <b>.05</b> | <b>3.45</b>  | <b>.001</b>     |
| Extraversion               | -.01         | .05        | -0.26        | >.250           |
| Agreeableness              | .11          | .04        | 2.72         | .006            |
| Neuroticism                | -.11         | .05        | -2.23        | .025            |
| <i>Not Alone</i>           |              |            |              |                 |
| Openness                   | -.04         | .05        | -0.77        | >.250           |
| Conscientiousness          | -.03         | .06        | -0.50        | >.250           |
| Extraversion               | .13          | .06        | 2.18         | .029            |
| Agreeableness              | -.09         | .06        | -1.62        | .105            |
| Neuroticism                | -.10         | .07        | -1.57        | .117            |
| <i>Stressful Situation</i> |              |            |              |                 |
| Openness                   | -.04         | .06        | -0.79        | >.250           |
| Conscientiousness          | .01          | .06        | 0.17         | >.250           |
| Extraversion               | .14          | .06        | 2.40         | .016            |
| Agreeableness              | -.05         | .06        | -0.75        | >.250           |
| Neuroticism                | <b>.40*</b>  | <b>.07</b> | <b>5.67</b>  | <b>&lt;.001</b> |
| <i>Positive Situation</i>  |              |            |              |                 |
| Openness                   | .03          | .05        | 0.51         | >.250           |
| Conscientiousness          | .10          | .06        | 1.83         | .068            |
| Extraversion               | .08          | .06        | 1.33         | .185            |
| Agreeableness              | <b>.19*</b>  | <b>.05</b> | <b>3.52</b>  | <b>&lt;.001</b> |
| Neuroticism                | <b>-.24*</b> | <b>.06</b> | <b>-4.19</b> | <b>&lt;.001</b> |

---

Significant effects ( $p < .005$ ) are marked by an asterisk and bolded text. b = unstandardized coefficients.

Supplemental Table S2. Cross-level interactions for thought quality outcomes predicted by on-task thought versus mind-wandering in the moment, moderated by personality factors (standardized and tested simultaneously).

|                       | b    | SE  | t     | p     |
|-----------------------|------|-----|-------|-------|
| <i>Pleasant</i>       |      |     |       |       |
| Openness              | -.03 | .04 | -0.60 | >.250 |
| Conscientiousness     | .02  | .04 | 0.41  | >.250 |
| Extraversion          | -.00 | .04 | -0.03 | >.250 |
| Agreeableness         | .07  | .04 | 1.63  | .104  |
| Neuroticism           | .05  | .04 | 1.31  | .191  |
| <i>Strange</i>        |      |     |       |       |
| Openness              | -.02 | .04 | -0.48 | >.250 |
| Conscientiousness     | -.01 | .03 | -0.36 | >.250 |
| Extraversion          | -.02 | .04 | -0.58 | >.250 |
| Agreeableness         | .06  | .03 | 2.10  | .035  |
| Neuroticism           | -.07 | .04 | -1.67 | .094  |
| <i>Clear</i>          |      |     |       |       |
| Openness              | -.02 | .04 | -0.48 | >.250 |
| Conscientiousness     | .02  | .04 | 0.47  | >.250 |
| Extraversion          | .02  | .04 | 0.56  | >.250 |
| Agreeableness         | .03  | .04 | 0.82  | >.250 |
| Neuroticism           | .01  | .05 | 0.21  | >.250 |
| <i>Hardly Control</i> |      |     |       |       |
| Openness              | -.03 | .04 | -0.70 | >.250 |
| Conscientiousness     | .05  | .04 | 1.36  | .175  |
| Extraversion          | -.04 | .04 | -1.26 | .209  |
| Agreeableness         | -.04 | .04 | -0.99 | >.250 |
| Neuroticism           | -.05 | .04 | -1.21 | .226  |

Supplemental Table S2 (continued).

|                    | b    | SE  | t     | p     |
|--------------------|------|-----|-------|-------|
| <i>No Thoughts</i> |      |     |       |       |
| Openness           | -.01 | .04 | -0.24 | >.250 |
| Conscientiousness  | .03  | .04 | 0.72  | >.250 |
| Extraversion       | -.00 | .04 | -0.10 | >.250 |
| Agreeableness      | -.03 | .04 | -0.72 | >.250 |
| Neuroticism        | -.04 | .04 | -1.04 | >.250 |
| <i>Racing</i>      |      |     |       |       |
| Openness           | .02  | .04 | 0.53  | >.250 |
| Conscientiousness  | -.02 | .04 | -0.40 | >.250 |
| Extraversion       | -.07 | .05 | -1.45 | .147  |
| Agreeableness      | -.02 | .04 | -0.54 | >.250 |
| Neuroticism        | -.03 | .04 | -0.74 | >.250 |
| <i>Suspicious</i>  |      |     |       |       |
| Openness           | -.00 | .03 | -0.13 | >.250 |
| Conscientiousness  | -.01 | .03 | -0.21 | >.250 |
| Extraversion       | -.05 | .03 | -1.99 | .047  |
| Agreeableness      | .00  | .03 | -0.13 | >.250 |
| Neuroticism        | -.05 | .03 | -1.60 | .109  |
| <i>Controlled</i>  |      |     |       |       |
| Openness           | .03  | .03 | 1.37  | .171  |
| Conscientiousness  | -.02 | .03 | -0.79 | >.250 |
| Extraversion       | -.06 | .03 | -2.06 | .040  |
| Agreeableness      | .02  | .04 | 0.44  | >.250 |
| Neuroticism        | -.06 | .04 | -1.64 | .100  |

Note. Significant effects ( $p < .005$ ) are marked by an asterisk and bolded text.  $b$  = unstandardized coefficients.

Supplemental Table S3. Cross-level interactions of theoretically relevant level-1 predictors of on-task thought versus mind-wandering with level-2 personality constructs (standardized and tested simultaneously).

|                   | $b$  | SE  | $t$   | $p$   |
|-------------------|------|-----|-------|-------|
| <i>Happy</i>      |      |     |       |       |
| Openness          | .01  | .02 | 0.38  | >.250 |
| Conscientiousness | .01  | .02 | 0.63  | >.250 |
| Extraversion      | .01  | .02 | 0.42  | >.250 |
| Agreeableness     | .02  | .02 | 1.34  | .181  |
| Neuroticism       | .02  | .02 | 0.84  | >.250 |
| <i>Irritable</i>  |      |     |       |       |
| Openness          | -.01 | .02 | -0.66 | >.250 |
| Conscientiousness | -.01 | .02 | -0.80 | >.250 |
| Extraversion      | -.02 | .02 | -1.00 | >.250 |
| Agreeableness     | -.02 | .02 | -1.57 | .116  |
| Neuroticism       | -.01 | .02 | -0.50 | >.250 |
| <i>Anxious</i>    |      |     |       |       |
| Openness          | .00  | .02 | 0.21  | >.250 |
| Conscientiousness | .00  | .02 | 0.15  | >.250 |
| Extraversion      | -.01 | .02 | -0.34 | >.250 |
| Agreeableness     | -.02 | .02 | -1.18 | .237  |
| Neuroticism       | -.02 | .02 | -1.07 | >.250 |
| <i>Sad</i>        |      |     |       |       |
| Openness          | -.00 | .02 | -0.13 | >.250 |
| Conscientiousness | -.01 | .02 | -0.79 | >.250 |
| Extraversion      | -.00 | .02 | -0.13 | >.250 |
| Agreeableness     | -.02 | .02 | -1.29 | .196  |
| Neuroticism       | -.00 | .02 | -0.20 | >.250 |





Supplemental Table S3. (continued).

|                            | b    | SE  | t     | p     |
|----------------------------|------|-----|-------|-------|
| <i>Stressful Situation</i> |      |     |       |       |
| Openness                   | -.00 | .02 | -0.00 | >.250 |
| Conscientiousness          | .00  | .02 | 0.23  | >.250 |
| Extraversion               | -.00 | .02 | -0.10 | >.250 |
| Agreeableness              | -.00 | .02 | -0.09 | >.250 |
| Neuroticism                | .01  | .02 | 0.61  | >.250 |

Significant effects ( $p < .005$ ) are marked by an asterisk and bolded text. b = unstandardized coefficients.
